# Supplementary material for: Characterization of the basal angiosperm Aristolochia fimbriata: a potential experimental system for genetic studies
Source: PubMed Central journal article supplement (PMC3621149; doi:10.1186/1471-2229-13-13), 2013-01-24

Additional File 3B: AT2G37630

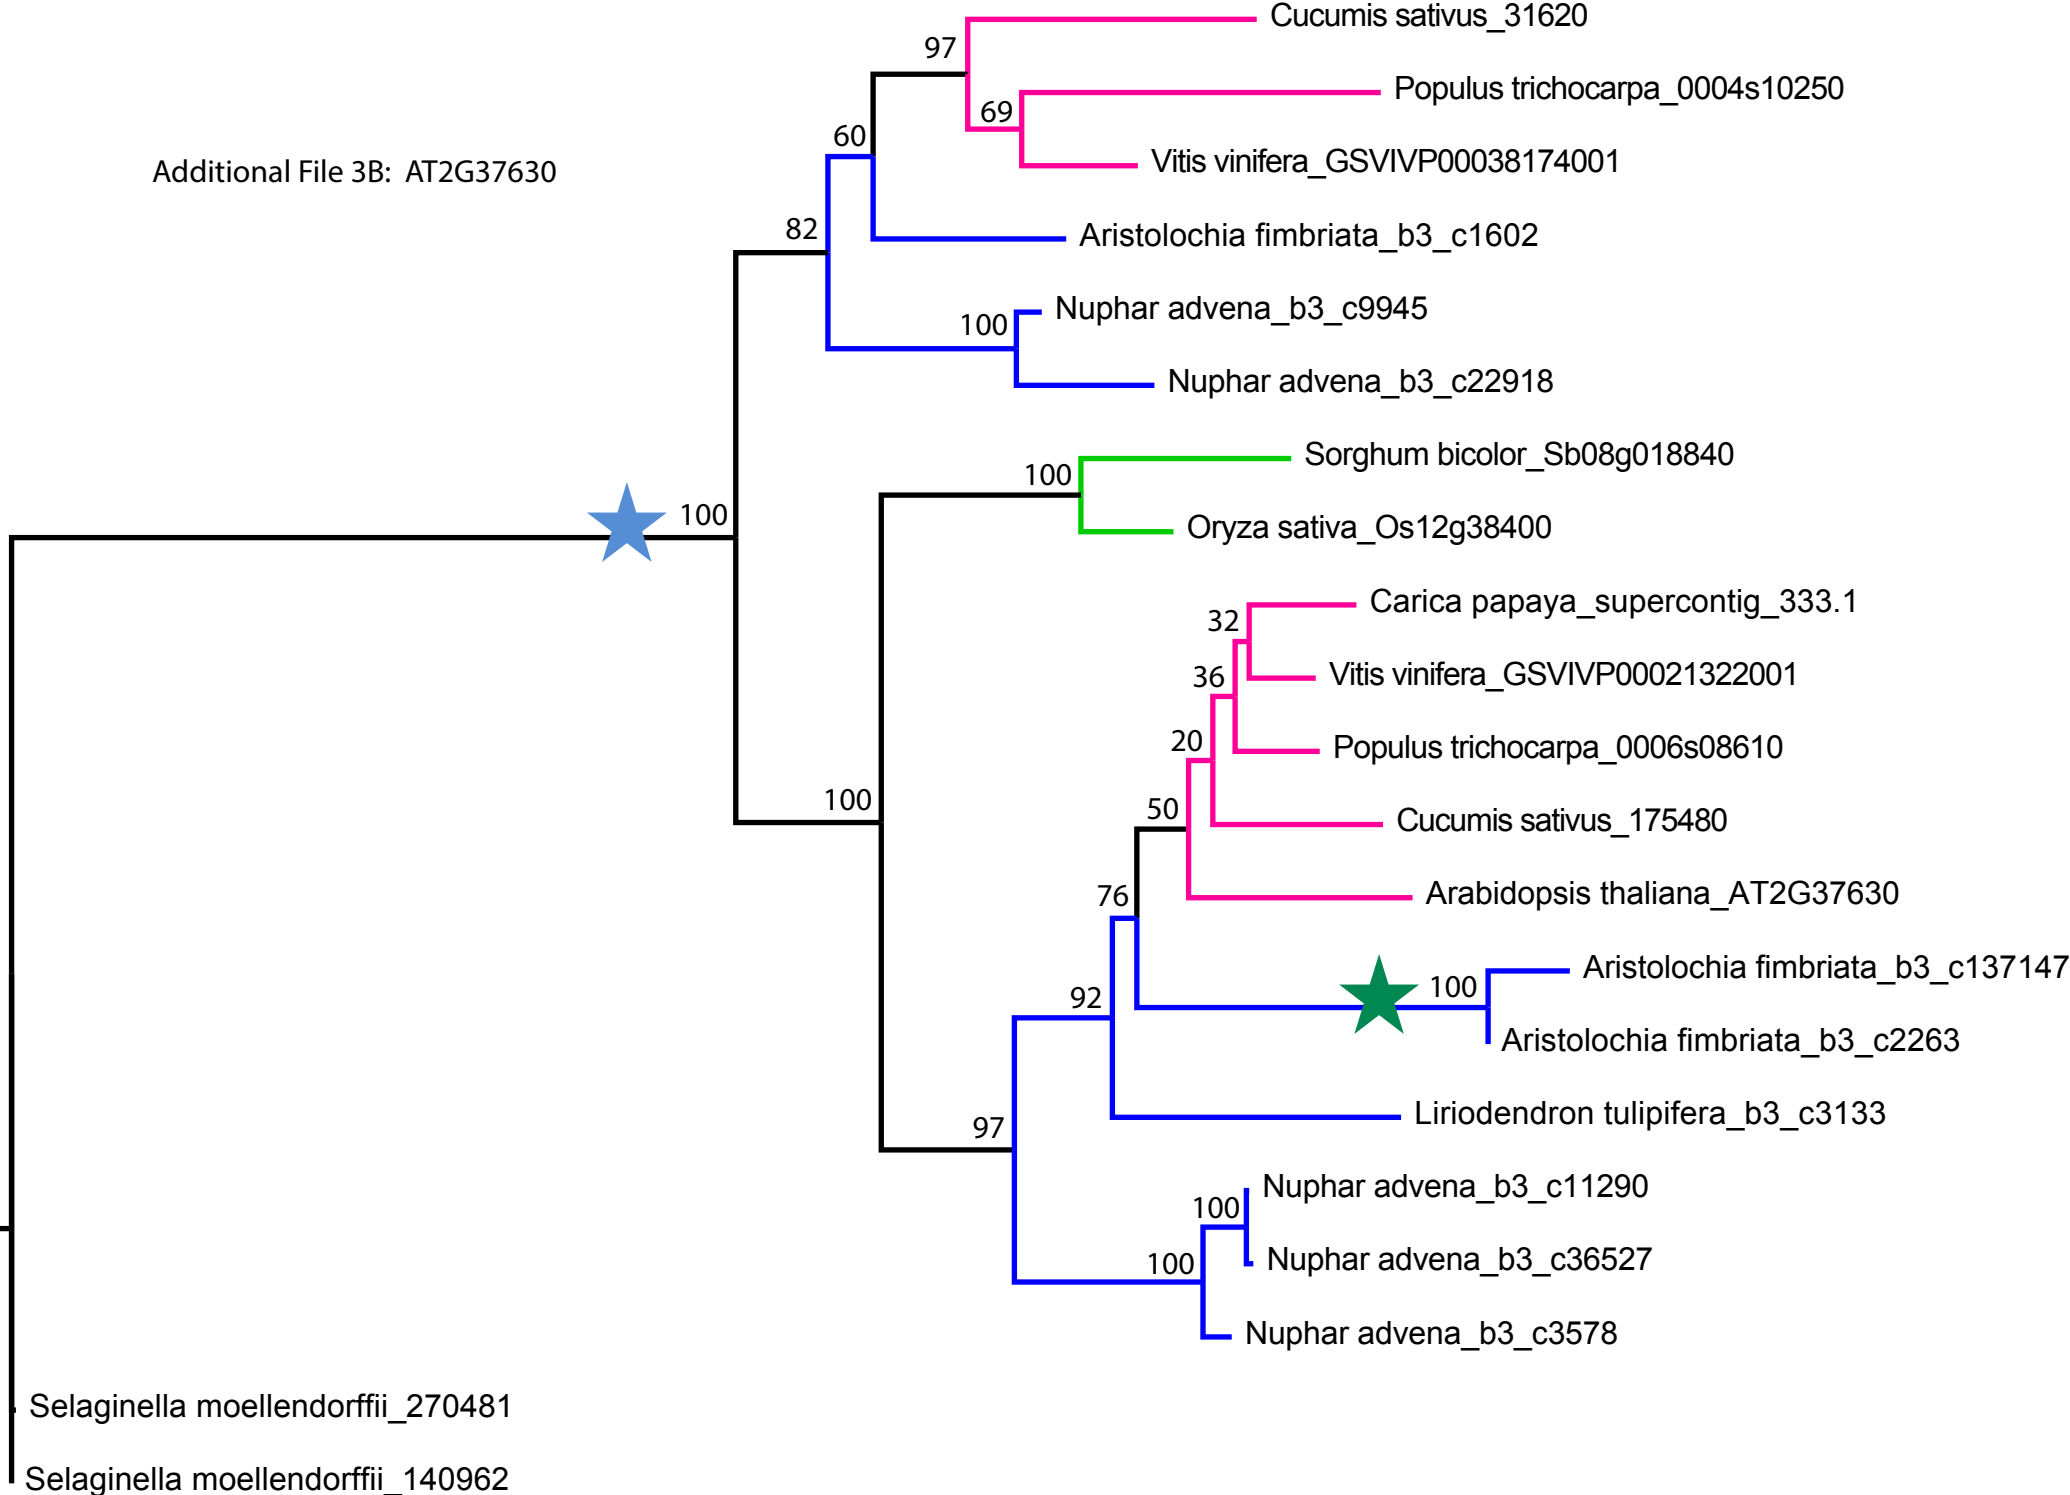

Supplement: 1471-2229-13-13-S4.pdf [file 1471-2229-13-13-S4.pdf]
